# Supplementary material for: The Plight of the Metabolite: Oxidative Stress and Tear Film Destabilisation Evident in Ocular Allergy Sufferers across Seasons in Victoria, Australia
Source: MDPI journal article supplement (doi:10.3390/ijms25074019), 2024-04-04
Supplement: s1 [file s1]

**Supplementary data Table S1.** Differentially expressed metabolites between peak allergy season OA suffers (PA) and peak allergy season healthy controls (PHC), as well as off-peak season allergy sufferers (OPA) and off-peak season healthy controls (OPHC). All metabolites had a minimum Log2 fold-change of +/- 1.5, VIP values of > 1 and a p-value≤0.05 as determined by two sample Welch's t-tests. p≤0.05 (\*), p≤0.02 (\*\*), p≤0.01 (\*\*\*). OAHFA- (O-acyl)-ω-hydroxy fatty acids; CE- cholesteryl ester; UK-CE- Unknown Cholesteryl Ester species; WE- wax ester; DE-I-Ch- type I diester; DE-II-Ch- type II diester; PC- phosphatidylcholine; PE- phosphatidylethanolamine; SM- sphingomyelin; TAG- triglyceride; DG- diglyceride.

| Metabolite                     | Fold-change (log <sub>2</sub> ) | p-value   | Significance |
|--------------------------------|---------------------------------|-----------|--------------|
| <i>Upregulated in PA/PHC</i>   |                                 |           |              |
| Uracil                         | 1.4955                          | 0.036819  | *            |
| Hydroxylamine                  | 1.6479                          | 0.035163  | *            |
| Cytosine                       | 1.6985                          | 0.0434    | *            |
| Decanoic acid                  | 1.7407                          | 0.048926  | *            |
| Inositol                       | 1.7568                          | 0.0345    | *            |
| Nonanoic acid                  | 1.9231                          | 0.032138  | *            |
| Ethanolamine                   | 1.974                           | 0.0092015 | ***          |
| Lauric acid                    | 2.0131                          | 0.048793  | *            |
| TAG(53:6)                      | 2.0658                          | 0.047593  | *            |
| Salicylic acid                 | 2.1065                          | 0.017881  | **           |
| Threonic acid                  | 2.1291                          | 0.013232  | **           |
| Trehalose                      | 2.1393                          | 0.026083  | *            |
| Maltose                        | 2.1442                          | 0.022889  | **           |
| Niacinamide                    | 2.1481                          | 0.032698  | *            |
| 1-Butylamine                   | 2.3559                          | 0.025628  | *            |
| Octanoic acid                  | 2.5657                          | 0.039637  | *            |
| PC(37:2)                       | 2.6215                          | 0.023596  | **           |
| Methylsuccinic acid            | 2.9707                          | 0.01414   | **           |
| Glycerol-3                     | 3.0148                          | 0.029682  | *            |
| Vanilmandelic acid             | 3.3264                          | 0.013312  | **           |
| OAHFA(54:0)                    | 3.4301                          | 0.010141  | ***          |
| DG(O-4:0_22:5)                 | 3.6116                          | 0.004867  | ***          |
| Mannose                        | 4.1316                          | 0.049107  | *            |
| CE(27:1)                       | 4.3654                          | 0.010844  | ***          |
| Gluconolactone                 | 4.3837                          | 0.0092689 | ***          |
| L-cystine                      | 6.206                           | 0.044313  | *            |
| N-Acetyl-L-phenylalanine       | 8.312                           | 0.038897  | *            |
| <i>Downregulated in PA/PHC</i> |                                 |           |              |
| Homogentisic acid              | -5.6202                         | 0.043959  | *            |
| Hexanoylglycine                | -3.2619                         | 0.0065767 | ***          |
| Ornithine                      | -2.1103                         | 0.04118   | *            |
| <i>Upregulated in OPA/OPHC</i> |                                 |           |              |
| Theanine                       | 1.5046                          | 0.0018488 | ***          |
| Azelaic acid                   | 1.5376                          | 0.0013216 | ***          |
| PC(38:2)                       | 1.5441                          | 0.008078  | ***          |
| UK_CE_10                       | 1.5787                          | 0.04625   | *            |
| OAHFA(42:3)                    | 1.5808                          | 0.020133  | **           |
| Glutaric acid                  | 1.6744                          | 0.013312  | **           |

|              |        |           |     |
|--------------|--------|-----------|-----|
| PC(36:1)     | 1.6764 | 0.0070447 | *** |
| Niacinamide  | 1.6799 | 0.01088   | *** |
| DE-II 62:3   | 1.7048 | 0.031197  | *   |
| UK_CE_3      | 1.7627 | 0.023141  | **  |
| DE-I-Ch 46:2 | 1.7704 | 0.037372  | *   |
| UK_CE_6      | 1.7931 | 0.033845  | *   |
| DE-I-Ch 47:2 | 1.799  | 0.049614  | *   |
| WE(43:3)     | 1.8145 | 0.049257  | *   |
| DE-II 61:2   | 1.8333 | 0.019969  | **  |
| OAHA(50:2)   | 1.8478 | 0.049241  | *   |
| TAG(53:2)    | 1.8579 | 0.048521  | *   |
| UK_CE_1      | 1.8658 | 0.019265  | **  |
| DE-II 64:4   | 1.8711 | 0.030463  | *   |
| DE-II 64:3   | 1.8724 | 0.035023  | *   |
| DE-II 65:3   | 1.8978 | 0.044752  | *   |
| DE-I-Ch 47:1 | 1.9027 | 0.031635  | *   |
| UK_CE_2      | 1.9208 | 0.031835  | *   |
| DE-I-Ch 48:2 | 1.921  | 0.035331  | *   |
| UK_CE_4      | 1.946  | 0.017753  | **  |
| UK_CE_5      | 1.9499 | 0.028134  | *   |
| DE-II 66:3   | 1.9539 | 0.027635  | *   |
| OAHA(43:1)   | 1.9661 | 0.04122   | *   |
| DE-II 65:2   | 1.9741 | 0.03398   | *   |
| DE-II 63:2   | 1.987  | 0.034024  | *   |
| DE-I-Ch 49:1 | 1.9877 | 0.039036  | *   |
| DE-II 67:2   | 1.9877 | 0.022305  | **  |
| DE-II 63:3   | 1.9992 | 0.048414  | *   |
| UK_CE_7      | 2.0095 | 0.029848  | *   |
| DE-II 68:3   | 2.0171 | 0.03513   | *   |
| DE-I-Ch 49:2 | 2.0177 | 0.038548  | *   |
| DE-I-Ch 48:3 | 2.0226 | 0.032033  | *   |
| DE-II 67:3   | 2.0296 | 0.037614  | *   |
| OAHA(44:1)   | 2.0368 | 0.030323  | *   |
| Adipic acid  | 2.0476 | 0.0030951 | *** |
| DE-I-Ch 39:0 | 2.0716 | 0.029774  | *   |
| DE-II 70:3   | 2.0724 | 0.03616   | *   |
| UK_CE_8      | 2.0794 | 0.029112  | *   |
| DE-I-Ch 51:5 | 2.0847 | 0.028944  | *   |
| DE-I-Ch 41:0 | 2.0877 | 0.034568  | *   |
| DE-II 66:4   | 2.1248 | 0.030055  | *   |
| DE-II 61:1   | 2.1256 | 0.026886  | *   |
| UK_CE_11     | 2.1548 | 0.02623   | *   |
| DE-I-Ch 51:2 | 2.1566 | 0.030702  | *   |
| DE-II 68:4   | 2.1602 | 0.023696  | **  |
| UK_CE_9      | 2.169  | 0.025139  | *   |
| DE-II 65:4   | 2.181  | 0.027699  | *   |
| DE-I-Ch 48:4 | 2.1832 | 0.031139  | *   |
| DE-I-Ch 50:2 | 2.1932 | 0.031621  | *   |
| DE-I-Ch 50:3 | 2.232  | 0.025833  | *   |
| OAHA(48:2)   | 2.2489 | 0.0047937 | *** |
| DE-II 70:4   | 2.2801 | 0.022069  | **  |

|                                  |         |            |     |
|----------------------------------|---------|------------|-----|
| DE-I-Ch 52:2                     | 2.3109  | 0.025681   | *   |
| DE-I-Ch 50:4                     | 2.3178  | 0.023281   | **  |
| WE(46:3)                         | 2.3202  | 0.047255   | *   |
| TAG(56:3)                        | 2.4293  | 0.049261   | *   |
| DE-I-Ch 42:1                     | 2.4313  | 0.013356   | *** |
| DE-I-Ch 42:2                     | 2.4543  | 0.015065   | **  |
| DE-I-Ch 52:3                     | 2.5261  | 0.016647   | **  |
| DE-I-Ch 52:4                     | 2.5746  | 0.026534   | *   |
| DE-II 60:1                       | 2.6865  | 0.026016   | *   |
| CE(24:1)                         | 2.7886  | 0.046622   | *   |
| DE-I-Ch 52:5                     | 2.849   | 0.0079534  | *** |
| DE-I-Ch 41:1                     | 3.0272  | 0.020328   | **  |
| OAHA(43:3)                       | 3.1617  | 0.021948   | **  |
| OAHA(45:2)                       | 3.2016  | 0.04288    | *   |
| OAHA(44:2)                       | 3.3366  | 0.0010566  | *** |
| WE(48:3)                         | 3.3383  | 0.039155   | *   |
| OAHA(40:2)                       | 3.3975  | 0.0079689  | *** |
| CE(25:0)                         | 3.477   | 0.030941   | *   |
| OAHA(49:2)                       | 3.4902  | 0.0041888  | *** |
| OAHA(46:2)                       | 3.5717  | 0.00035948 | *** |
| Uridine                          | 4.0366  | 0.048082   | *   |
| OAHA(47:2)                       | 4.0949  | 0.042489   | *   |
| Acetoacetic acid                 | 4.5341  | 0.013569   | *** |
| OAHA(51:2)                       | 4.946   | 0.0068987  | *** |
| Tagatose                         | 5.1446  | 0.014546   | *** |
| OAHA(50:6)                       | 5.5589  | 0.015442   | **  |
| <i>Downregulated in OPA/OPHC</i> |         |            |     |
| Pyridoxine                       | -1.927  | 0.039064   | *   |
| Sorbose                          | -1.6814 | 0.02022    | **  |
| Catechol                         | -1.5591 | 0.020238   | **  |

**Supplementary data Table S2.** Differentially expressed metabolites among allergy sufferers and healthy controls across peak allergy season and off-peak season. All metabolites had a minimum Log2 fold-change of +/- 1.5, VIP values of > 1 and a p-value≤0.05 as determined by two sample Welch's t-tests. p≤0.05 (\*), p≤0.02 (\*\*), p≤0.01 (\*\*\*). OAHA- (O-acyl)-ω-hydroxy fatty acids; CE- cholesteryl ester; WE- wax ester; DE-I-Ch- type I diester; DE-II-Ch- type II diester; PC- phosphatidylcholine; PE-phosphatidylethanolamine; SM- sphingomyelin; TAG- triglyceride; DG- diglyceride.

| Metabolite                   | Fold-change (log <sub>2</sub> ) | p-value  | Significance |
|------------------------------|---------------------------------|----------|--------------|
| <i>Upregulated in PA/OPA</i> |                                 |          |              |
| OAHA(46:0)                   | 1.8219                          | 0.033131 | *            |
| Epinephrine-3                | 2.3765                          | 0.049868 | *            |
| Fructose 1-phosphate-meto-6  | 2.6012                          | 0.022147 | **           |
| Psicose-meto-5               | 3.0132                          | 0.027601 | *            |
| Pinitol-5                    | 3.2739                          | 0.038442 | *            |
| DG(O-4:0_22:5)               | 3.5137                          | 0.005348 | ***          |
| Glycerol-3                   | 3.613                           | 0.015592 | **           |
| Sorbose-meto-5.1             | 3.6943                          | 0.0498   | *            |
| Xylulose-meto-4              | 4.6378                          | 0.030692 | *            |

|                             |                                  |           |     |
|-----------------------------|----------------------------------|-----------|-----|
| 5-Dehydroquinic acid-meto-4 | 5.6065                           | 0.032653  | *   |
|                             | <i>Downregulated in PA/OPA</i>   |           |     |
| PE(18:2/22:6)               | -1.9319                          | 0.040596  | *   |
|                             | <i>Upregulated in PHC/OPHC</i>   |           |     |
| Adipic acid                 | 1.5104                           | 0.012405  | *** |
| OAHA(42:1)                  | 1.5652                           | 0.036103  | *   |
| Phenylalanine               | 1.6039                           | 0.021474  | **  |
| Leucine                     | 1.7169                           | 0.025477  | *   |
| OAHA(44:1)                  | 1.8774                           | 0.024632  | **  |
| OAHA(43:1)                  | 1.8844                           | 0.025759  | *   |
| Methionine                  | 1.8984                           | 0.0099615 | *** |
| Tyrosine                    | 1.9555                           | 0.021424  | **  |
| OAHA(50:3)                  | 1.983                            | 0.048843  | *   |
| OAHA(43:2)                  | 2.0143                           | 0.016793  | **  |
| OAHA(44:0)                  | 2.0709                           | 0.025958  | *   |
| DE-I-Ch 42:2                | 2.1363                           | 0.031688  | *   |
| DE-II 62:1                  | 2.1515                           | 0.046381  | *   |
| DG(16:1_18:2)               | 2.1833                           | 0.028811  | *   |
| OAHA(43:4)                  | 2.2995                           | 0.012623  | *** |
| WE(44:3)                    | 2.484                            | 0.032582  | *   |
| OAHA(47:1)                  | 2.5946                           | 0.049298  | *   |
| WE(43:3)                    | 2.6383                           | 0.03371   | *   |
| Guanine                     | 2.9757                           | 0.021587  | **  |
| OAHA(41:0)                  | 2.9931                           | 0.049998  | *   |
| WE(46:3)                    | 3.0245                           | 0.033224  | *   |
| OAHA(44:2)                  | 3.0509                           | 0.02983   | *   |
| OAHA(52:2)                  | 3.3568                           | 0.04955   | *   |
| DE-I-Ch 41:1                | 3.4408                           | 0.029428  | *   |
| OAHA(46:2)                  | 3.5822                           | 0.028274  | *   |
| Inosine                     | 4.1857                           | 0.04009   | *   |
| 3-Hydroxyisovaleric acid    | 4.1982                           | 0.047835  | *   |
| Uridine                     | 4.2268                           | 0.013148  | *** |
| WE(45:3)                    | 4.2703                           | 0.0082001 | *** |
| OAHA(45:2)                  | 5.7169                           | 0.045157  | *   |
| OAHA(51:2)                  | 6.2113                           | 0.0091643 | *** |
|                             | <i>Downregulated in PHC/OPHC</i> |           |     |
| Eicosapentaenoic acid       | -2.4758                          | 0.0029644 | *** |
| SM(d35:2)                   | -2.3577                          | 0.0071879 | *** |
| PC(34:4)                    | -2.3023                          | 0.018937  | **  |
| PC(37:3)                    | -2.226                           | 0.017761  | **  |
| PC(35:3)                    | -2.1655                          | 0.02431   | *   |
| PE(18:0/20:3)               | -2.1655                          | 0.02431   | *   |
| Orotic acid                 | -1.5883                          | 0.033866  | *   |
